# Supplementary material for: The Salisbury House `Porticus'
Source: MDPI journal article supplement (doi:10.3390/cancers14246021), 2006-01-01
Supplement: s1 [file s1]

# Supplementary Material: Role of Epidermal Growth Factor Receptor-Specific CAR-T Cells in the Suppression of Esophageal Squamous Cell Carcinoma

Chen Cheng, Heyang Cui, Huijuan Liu, Yueguang Wu, Ning Ding, Yongjia Weng, Weimin Zhang \* and Yongping Cui.\*

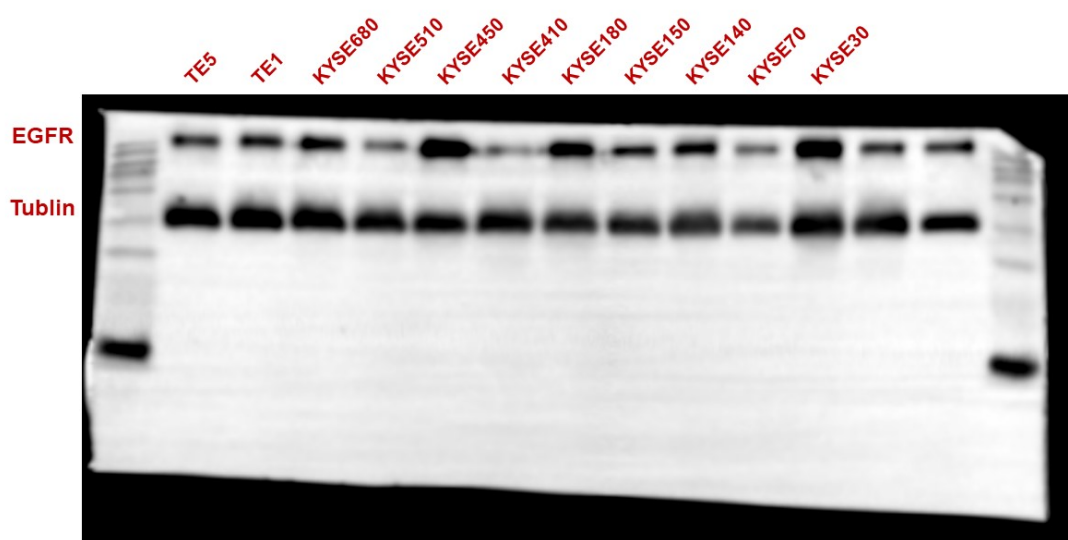

**Figure S1.** Uncropped Western blot image Figure 2C.
